# Supplementary material
Source: PubMed Central journal article supplement (PMC2440907)
Supplement: 39570.749884.BE_1.pdf [file 39570.749884.BE_1.pdf]

## Web references

- (1) 'Breakthrough' project helps trim OR delays. *OR Manager* 1997; 13(5):21-22.
- (2) Baier RR, Gifford DR, Lyder CH, Schall MW, Funston-Dillon DL, Lewis JM et al. Quality improvement for pressure ulcer care in the nursing home setting: the Northeast Pressure Ulcer Project. *J Am Med Dir Assoc* 2003; 4(6):291-301.
- (3) Bartlett J, Cameron P, Cisera M. The Victorian emergency department collaboration. *Int J Qual Health Care* 2002; 14(6):463-470.
- (4) Berry BB, Geary DL, Jaff MR. A model for collaboration in quality improvement projects: implementing a weight-based heparin dosing nomogram across an integrated health care delivery system. *Jt Comm J Qual Improv* 1998; 24(9):459-469.
- (5) Besserman E, Brennan M, Brown PA, Cleaves S, Nemeth WJ. Multidisciplinary achievement: the collaborative approach to rapid cycle ICU and hospital change. *Qual Manag Health Care* 1998; 6(4):43-51.
- (6) Bonomi AE, Wagner EH, Glasgow RE, VonKorff M. Assessment of chronic illness care (ACIC): a practical tool to measure quality improvement. *Health Serv Res* 2002; 37(3):791-820.
- (7) Brattebo G, Hofoss D, Flaatten H, Muri AK, Gjerde S, Plsek PE. Quality improvement report: Effect of a scoring system and protocol for sedation on duration of patients' need for ventilator support in a surgical intensive care unit. *British Medical Journal* 2002; 324(7350): 1386-1389:-1389.
- (8) Bundy DG, Randolph GD, Murray M, Anderson J, Margolis PA. Open access in primary care: results of a North Carolina pilot project. *Pediatrics* 2005; 116(1):82-87.
- (9) Burch K, Rhine W, Baker R, Litman F, Kaempf JW, Schwarz E et al. Implementing potentially better practices to reduce lung injury in neonates. *Pediatrics* 2003; 111(4 Pt 2):e432-e436.
- (10) Chin MH, Cook S, Drum ML, Jin L, Guillen M, Humikowski CA et al. Improving diabetes care in midwest community health centers with the health disparities collaborative. *Diabetes Care* 2004; 27(1):2-8.
- (11) Cleeland CS, Reyes-Gibby CC, Schall M, Nolan K, Paice J, Rosenberg JM et al. Rapid improvement in pain management: the Veterans Health Administration and the institute for healthcare improvement collaborative. *Clin J Pain* 2003; 19(5):298-305.
- (12) Daniel DM, Norman J, Davis C, Lee H, Hindmarsh MF, McCulloch DK et al. A state-level application of the chronic illness breakthrough series: results from two collaboratives on diabetes in Washington State. *Jt Comm J Qual Saf* 2004; 30(2):69-79.

- (13) Dellinger EP, Hausmann SM, Bratzler DW, Johnson RM, Daniel DM, Bunt KM et al. Hospitals collaborate to decrease surgical site infections. *Am J Surg* 2005; 190(1):9-15.
- (14) Doran KA, Henry SA, Anderson BJ. Breakthrough change for adult cardiac surgery in a community-based cardiovascular program. *Qual Manag Health Care* 1998; 6(4):29-36.
- (15) Farbstein K, Clough J. Improving medication safety across a multihospital system. *Jt Comm J Qual Improv* 2001; 27(3):123-137.
- (16) Flamm BL, Berwick DM, Kabacoff A. Reducing cesarean section rates safely: lessons from a "breakthrough series" collaborative. *Birth* 1998; 25(2):117-124.
- (17) Glasgow RE, Funnell MM, Bonomi AE, Davis C, Beckham V, Wagner EH. Self-management aspects of the improving chronic illness care breakthrough series: implementation with diabetes and heart failure teams. *Ann Behav Med* 2002; 24(2):80-87.
- (18) Green PL, Plsek PE. Coaching and leadership for the diffusion of innovation in health care: a different type of multi-organization improvement collaborative. *Jt Comm J Qual Improv* 2002; 28(2):55-71.
- (19) Gregory KD, Hackmeyer P, Gold L, Johnson AI, Platt LD. Using the continuous quality improvement process to safely lower the cesarean section rate. *Jt Comm J Qual Improv* 1999; 25(12):619-629.
- (20) Henderson D, Dempsey C, Larson K, Appleby D. The impact of IMPACT on St. John's Regional Health Center. *Mo Med* 2003; 100(6):590-592.
- (21) Henderson D, Dempsey C, Appleby D. A case study of successful patient flow methods: St. John's Hospital. *Front Health Serv Manage* 2004; 20(4):25-30.
- (22) Kaempf JW, Campbell B, Sklar RS, Arduza C, Gallegos R, Zabari M et al. Implementing potentially better practices to improve neonatal outcomes after reducing postnatal dexamethasone use in infants born between 501 and 1250 grams. *Pediatrics* 2003; 111(4 Pt 2):e534-e541.
- (23) Katzelnick DJ, Von-Korff M, Chung H, Provost LP, Wagner EH. Applying depression-specific change concepts in a collaborative breakthrough series. *Jt Comm J Qual Patient Saf* 2005; 31(7):386-397.
- (24) Kilbride HW, Wirtschafter DD, Powers RJ, Sheehan MB. Implementation of evidence-based potentially better practices to decrease nosocomial infections. *Pediatrics* 2003; 111(4 Pt 2):e519-e533.
- (25) Kosseff AL, Niemeier S. SSM Health Care clinical collaboratives: improving the value of patient care in a health care system. *Jt Comm J Qual Improv* 2001; 27(1):5-19.

- (26) LaBresh KA, Ellrodt AG, Gliklich R, Liljestrand J, Peto R. Get with the guidelines for cardiovascular secondary prevention: pilot results. *Arch Intern Med* 2004; 164(2):203-209.
- (27) Lain J, Young C, Dworkin G, Rackstein A. Improving efficiencies and reducing costs in adult cardiac surgery: a team approach. *Qual Manag Health Care* 1998; 6(4):37-41.
- (28) Leape LL, Kabcenell AI, Gandhi TK, Carver P, Nolan TW, Berwick DM. Reducing adverse drug events: lessons from a breakthrough series collaborative. *Jt Comm J Qual Improv* 2000; 26(6):321-331.
- (29) Lynn J, Nolan K, Kabcenell A, Weissman D, Milne C, Berwick DM. Reforming care for persons near the end of life: the promise of quality improvement. *Ann Intern Med* 2002; 137(2):117-122.
- (30) Malenka DJ, O'Connor GT. The Northern New England Cardiovascular Disease Study Group: a regional collaborative effort for continuous quality improvement in cardiovascular disease. *Jt Comm J Qual Improv* 1998; 24(10):594-600.
- (31) Mills PD, Weeks WB, Surott-Kimberly BC. A multihospital safety improvement effort and the dissemination of new knowledge. *Jt Comm J Qual Saf* 2003; 29(3):124-133.
- (32) Mills PD, Weeks WB. Characteristics of successful quality improvement teams: lessons from five collaborative projects in the VHA. *Jt Comm J Qual Saf* 2004; 30(3):152-162.
- (33) Neily J, Howard K, Quigley P, Mills PD. One-year follow-up after a collaborative breakthrough series on reducing falls and fall-related injuries. *Jt Comm J Qual Patient Saf* 2005; 31(5):275-285.
- (34) Nolan K, Schall MW, Erb F, Nolan T. Using a framework for spread: The case of patient access in the Veterans Health Administration. *Jt Comm J Qual Patient Saf* 2005; 31(6):339-347.
- (35) Nugent WC. Building and supporting sustainable improvement in cardiac surgery: the Northern New England experience. *Semin Cardiothorac Vasc Anesth* 2005; 9(2):115-118.
- (36) Pearson ML, Wu S, Schaefer J, Bonomi AE, Shortell SM, Mendel PJ et al. Assessing the implementation of the chronic care model in quality improvement collaboratives. *Health Serv Res* 2005; 40(4):978-996.
- (37) Saunders RP, Abraham MR, Crosby MJ, Thomas K, Edwards WH. Evaluation and development of potentially better practices for improving family-centered care in neonatal intensive care units. *Pediatrics* 2003; 111(4 Pt 2):e437-e449.
- (38) Schiff GD, Wisniewski M, Bult J, Parada JP, Aggarwal H, Schwartz DN. Improving inpatient antibiotic prescribing: insights from participation in a national collaborative. *Jt Comm J Qual Improv* 2001; 27(8):387-402.

- (39) Silver MP, Antonow JA. Reducing medication errors in hospitals: a peer review organization collaboration. *Jt Comm J Qual Improv* 2000; 26(6):332-340.
- (40) Siomos EE, Newsom RS, Camponeschi J, Remington PL. A statewide collaboration to monitor diabetes quality improvement among Wisconsin health plans. *Am J Manag Care* 2005; 11(5):332-336.
- (41) Toncich G, Cameron P, Virtue E, Bartlett J, Ugoni A. Institute for Health Care Improvement Collaborative Trial to improve process times in an Australian emergency department. *J Qual Clin Pract* 2000; 20(2-3):79-86.
- (42) Wagner EH, Glasgow RE, Davis C, Bonomi AE, Provost L, McCulloch D et al. Quality improvement in chronic illness care: a collaborative approach. *Jt Comm J Qual Improv* 2001; 27(2):63-80.
- (43) Wang A, Wolf M, Carlyle R, Wilkerson J, Porterfield D, Reaves J. The North Carolina experience with the diabetes health disparities collaboratives. *Jt Comm J Qual Saf* 2004; 30(7):396-404.
- (44) Zhang H, Alexander JA, Luttrell J, O'Connor GT, Daley J, Paris M. Data feedback and clinical process improvement in acute myocardial infarction. *Am Heart J* 2005; 149(5):856-861.
- (45) Armstrong B, Levesque O, Perlin JB, Rick C, Schectman G. Reinventing Veterans Health Administration: focus on primary care. *J Healthc Manag* 2005; 50(6):399-408.
- (46) Baird RW. Health care research and improvement. Quality improvement efforts in the intensive care unit: development of a new heparin protocol... including commentary by Brock WA and Clemmer TP. *Baylor Univ Med Cent Proc* 2001; 14(3):294-298.
- (47) Griffith C, Turner J. United Kingdom National Health Service, Cancer Services Collaborative "Improvement Partnership", Redesign of Cancer Services: A National Approach. *Eur J Surg Oncol* 2004; 30 Suppl 1:1-86.
- (48) Hankinson MT, Faraone D, Blumenfrucht M. Sustained improvement for specialty clinic access. *Jt Comm J Qual Patient Saf* 2006; 32(3):142-151.
- (49) Joshi M, Kazandjian V, Martin P, Minogue W, Christian D, Silverman N et al. John M. Eisenberg Patient Safety and Quality Awards: a comprehensive grassroots model for statewide safety improvement. *Joint Comm J Qual Patient Saf* 2005; 31(12):671-677.
- (50) Landis SE, Schwarz M, Curran DR. North Carolina family medicine residency programs' diabetes learning collaborative. *Fam Med* 2006; 38(3):190-195.
- (51) Resar R, Pronovost P, Haraden C, Simmonds T, Rainey T, Nolan T. Using a bundle approach to improve ventilator care processes and reduce ventilator-associated pneumonia. *Jt Comm J Qual Patient Saf* 2005; 31(5):243-248.

- (52) Rogers G, Alper E, Brunelle D, Federico F, Fenn CA, Leape LL et al. Reconciling medications at admission: safe practice recommendations and implementation strategies. *Jt Comm J Qual Patient Saf* 2006; 32(1):37-50.
- (53) Young PC, Glade GB, Stoddard GJ, Norlin C. Evaluation of a learning collaborative to improve the delivery of preventive services by pediatric practices. *Pediatrics* 2006; 117(5):1469-1476.
- (54) Lynn J. Reforming the care system to support those coming to the end of life. *Cancer Control* 1999; 6(2): 131-135:-135.
- (55) Gitomer RS. Improving access, quality of care, and patient satisfaction in a general internal medicine practice. *Journal of Clinical Outcomes Management* 2005; 12(5): 245-249:-249.
- (56) Daniel DM, Norman J, Davis C, Lee H, Hindmarsh MF, McCulloch DK et al. Case studies from two collaboratives on diabetes in Washington State. *Jt Comm J Qual Saf* 2004; 30(2):103-8, 57.
- (57) Whittington J, Cohen H. OSF healthcare's journey in patient safety. *Qual Manag Health Care* 2004; 13(1):53-59.
- (58) Weeks WB, Mills PD, Dittus RS, Aron DC, Batalden PB. Using an improvement model to reduce adverse drug events in VA facilities. *Jt Comm J Qual Improv* 2001; 27(5):243-254.
- (59) Womer RB, Tracy E, Soo-Hoo W, Bickert B, DiTaranto S, Barnsteiner JH. Multidisciplinary systems approach to chemotherapy safety: rebuilding processes and holding the gains. *J Clin Oncol* 2002; 20(24):4705-4712.
- (60) O'Connor GT, Plume SK, Olmstead EM, Morton JR, Maloney CT, Nugent WC et al. A regional intervention to improve the hospital mortality associated with coronary artery bypass graft surgery. The Northern New England Cardiovascular Disease Study Group. *JAMA* 1996; 275(11):841-846.
- (61) Baier RR, Gifford DR, Patry G, Banks SM, Rochon T, DeSilva D et al. Ameliorating pain in nursing homes: a collaborative quality-improvement project. *J Am Geriatr Soc* 2004; 52(12):1988-1995.
- (62) Benedetti R, Flock B, Pedersen S, Ahern M. Improved clinical outcomes for fee-for-service physician practices participating in a diabetes care collaborative. *Jt Comm J Qual Saf* 2004; 30(4):187-194.
- (63) Landon BE, Wilson IB, McInnes K, Landrum MB, Hirschhorn L, Marsden PV et al. Improving patient care. Effects of a quality improvement collaborative on the outcome of care of patients with HIV infection: the EQHIV study. *Ann Intern Med* 2004; 140(11):887-96, I92.
- (64) Homer CJ, Forbes P, Horvitz L, Peterson LE, Wypij D, Heinrich P. Impact of a quality improvement program on care and outcomes for children with asthma. *Arch Pediatr Adolesc Med* 2005; 159(5):464-469.

- (65) Mangione-Smith R, Schonlau M, Chan KS, Keeseey J, Rosen M, Louis TA et al. Measuring the effectiveness of a collaborative for quality improvement in pediatric asthma care: does implementing the chronic care model improve processes and outcomes of care? *Ambul Pediatr* 2005; 5(2):75-82.
- (66) Schonlau M, Mangione-Smith R, Chan KS, Keeseey J, Rosen M, Louis TA et al. Evaluation of a quality improvement collaborative in asthma care: does it improve processes and outcomes of care? *Ann Fam Med* 2005; 3(3):200-208.
- (67) Asch SM, Baker DW, Keeseey JW, Broder M, Schonlau M, Rosen M et al. Does the collaborative model improve care for chronic heart failure? *Med Care* 2005; 43(7):667-675.
- (68) Baker DW, Asch SM, Keeseey JW, Brown JA, Chan KS, Joyce G et al. Differences in education, knowledge, self-management activities, and health outcomes for patients with heart failure cared for under the chronic disease model: the improving chronic illness care evaluation. *J Card Fail* 2005; 11(6):405-413.
- (69) Horbar JD, Rogowski J, Plsek PE, Delmore P, Edwards WH, Hocker J et al. Collaborative quality improvement for neonatal intensive care. *Pediatrics* 2001; 107(1): 14-22:-22.
- (70) Rogowski JA, Horbar JD, Plsek PE, Baker LS, Deterding J, Edwards WH et al. Economic implications of neonatal intensive care unit collaborative quality improvement. *Pediatrics* 2001; 107(1):23-29.
- (71) Horbar JD, Carpenter JH, Buzas J, Soll RF, Suresh G, Bracken MB et al. Collaborative quality improvement to promote evidence based surfactant for preterm infants: a cluster randomised trial. *BMJ* 2004; 329(7473):1004.
- (72) Pierce-Bulger M, Nighswander T. Nutaqsiivik--an approach to reducing infant mortality using quality improvement principles. *Qual Manag Health Care* 2001; 9(3):40-
